# Supplementary material
Source: PubMed Central journal article supplement (PMC2801252)
Supplement: supp_M109.041285_jbc.M109.041285-1.pdf [file supp_M109.041285_jbc.M109.041285-1.pdf]

## X-ray crystallographic analysis of the 6-aminohexanoate cyclic dimer hydrolase: catalytic mechanism and evolution of an enzyme responsible for nylon-6 byproduct degradation

### SUPPLEMENTARY DATA ON-LINE

#### Legend for supplementary figures

**Fig. S1. Multiple 3D-alignment of 6-aminohexanoate cyclic dimer hydrolase (NylA), glutamyl-tRNA<sup>Gln</sup> amidotransferase subunit A (GAT), malonamidase E2 (MAE2) and peptide amidase (PAM).**  $\alpha$ -Helices and  $\beta$ -strands of NylA shown in Fig. 2A are illustrated at the top with green cylinders ( $\alpha$ -helix) and orange arrows ( $\beta$ -strands). Multiple 3D alignments were carried out using Secondary Structure Matching (SSM) (45), and the secondary structures are shown as *green* (helix) or *orange* ( $\beta$ -strand) letters. The numbering of GAT, MAE2 and PAM is the same as the numbering registered in PDB. The Ser-*cis*-Ser-Lys catalytic triads conserved in AS family enzymes [Ser174-*cis*-Ser150-Lys72 (NylA), (Ser178-*cis*-Ser154-Lys79) (GAT), Ser155-*cis*-Ser131-Lys62 (MAE2), Ser226-*cis*-Ser202-Lys123 (PAM)] are shown as *red* letters marked with *yellow*. Acd-binding residues (Asn125 and Cys316) in NylA are marked with *light blue*.

**Fig. S2. Stereoviews of overall structures of 6-aminohexanoate cyclic dimer hydrolase (NylA).** Superimposition of NylA structure (*green*) with glutamyl-tRNA<sup>Gln</sup> amidotransferase subunit A (PDB ID: 2DF4; *blue*) (A), malonamidase E2 (PDB ID: 1ocm; *purple*) (B), and peptide amidase (PDB ID code: 1m21; *olive*) (C). Superimposition was carried out on the transformation matrix generated by Secondary Structure Matching (SSM) (45).

**Fig. S3. CD spectra at far UV for NylA and various mutants in 20 mM potassium phosphate buffer (pH 7.3) containing 10% glycerol.** CD measurements were carried out in a J-720WI spectropolarimeter (Jasco). Cuvette with a pathlength of 1 mm was used for far UV CD. The results are expressed as the mean residue molar ellipticity,  $[\theta]$ , defined as  $[\theta] = 100 (\theta_{\text{obs}} - \theta_{\text{back}}) / l c$ , where  $\theta_{\text{obs}}$  is the observed ellipticity in degrees,  $\theta_{\text{back}}$  is the observed ellipticity in degrees without enzyme as background,  $c$  is the molar concentration of the residue, and  $l$  is the length of the light path (in centimeters). The temperature was controlled at 25 °C with a Jasco PTC-348WI peltier system. The protein concentration used (in far UV CD measurements) was 0.11 mg ml<sup>-1</sup>. **A.** Wild-type NylA (*orange*), NylA-A<sup>150</sup> (*green*); **B.** Wild-type NylA (*orange*), NylA-A<sup>125</sup> (*blue*), NylA-S<sup>316</sup> (*yellow green*), NylA-D<sup>316</sup> (*pink*).

**Fig. S4. Temperature factors for NylA and NylA-A<sup>174</sup>/Acd complex.** **A.** Average values for  $C_{\alpha}$ ,  $C$ ,  $N$  in each amino acid residue are plotted as a function of residue number. **B.** Data for amino acid positions 300-450 are shown with the positions of  $\alpha$ -helices (H14-H18),  $\beta$ -strands ( $\beta$ 9- $\beta$ 11), and the loop region. Open circle, wild-type NylA; closed circle, NylA-A<sup>174</sup>/Acd complex.

### Supplementary Table

Table S1. Primer DNA used for site-directed mutagenesis of *nylA* gene

| Primer                 | Mutation               | Sequence                                                                                        |
|------------------------|------------------------|-------------------------------------------------------------------------------------------------|
| <b>A</b>               |                        |                                                                                                 |
| FE1K72A                | K72A                   | 5'-TGCCCTATCTTCTG <u>GCG</u> GACCTCACC-3'                                                       |
| FE1S150A               | S150A                  | 5'-TCGTTGGCGGAG <u>GCG</u> AGCGGCGGCTCA-3'                                                      |
| FE1S174A               | S174A                  | 5'-GACGCGGCAGGT <u>GCT</u> GTGCGCATACT-3'                                                       |
| RE1C316E               | C316E                  | 5'-GATCGCGACGTC <u>CCT</u> CAATCGTCGAGTAG-3'                                                    |
| RE1C316X               | C316D, C316G<br>C316S, | 5'-GATCGCGACGTC <u>NNN</u> AATCGTCGAGTAG-3'                                                     |
| <b>B</b>               |                        |                                                                                                 |
| FE1N125A<br>RE1N125A   | N125A                  | 5'-GAGATGGGCG <u>GCT</u> CAGGTAACGACGGAGCCC-3'<br>5'-CGTTACCTG <u>AGC</u> GCCCATCTCCGGTGTATT-3' |
| FE1C316-3<br>RE1C316-3 | C316A                  | 5'-ACGATT <u>NCC</u> GACGTCGCGATCGCGCGA-3'<br>5'-GACGTC <u>GGN</u> AATCGTCGAGTAGTCCTT-3'        |
| FE1C316-2<br>RE1C316-2 | C316K                  | 5'-ACGATT <u>NAG</u> GACGTCGCGATCGCGCGA-3'<br>5'-GACGTC <u>CTN</u> AATCGTCGAGTAGTCCTT-3'        |
| FE1C316-1<br>RE1C316-1 | C316N                  | 5'-ACGATT <u>NAC</u> GACGTCGCGATCGCGCGA-3'<br>5'-GACGTC <u>GTN</u> AATCGTCGAGTAGTCCTT-3')       |

- A. Site-directed mutagenesis was carried by "modification of restriction-site (MR)" method (23).  
 B. Site-directed mutagenesis was performed using the PrimeSTAR mutagenesis kit (Takara Bio Inc., Otsu, Japan). Mutated sites in the primer sequences are underlined.

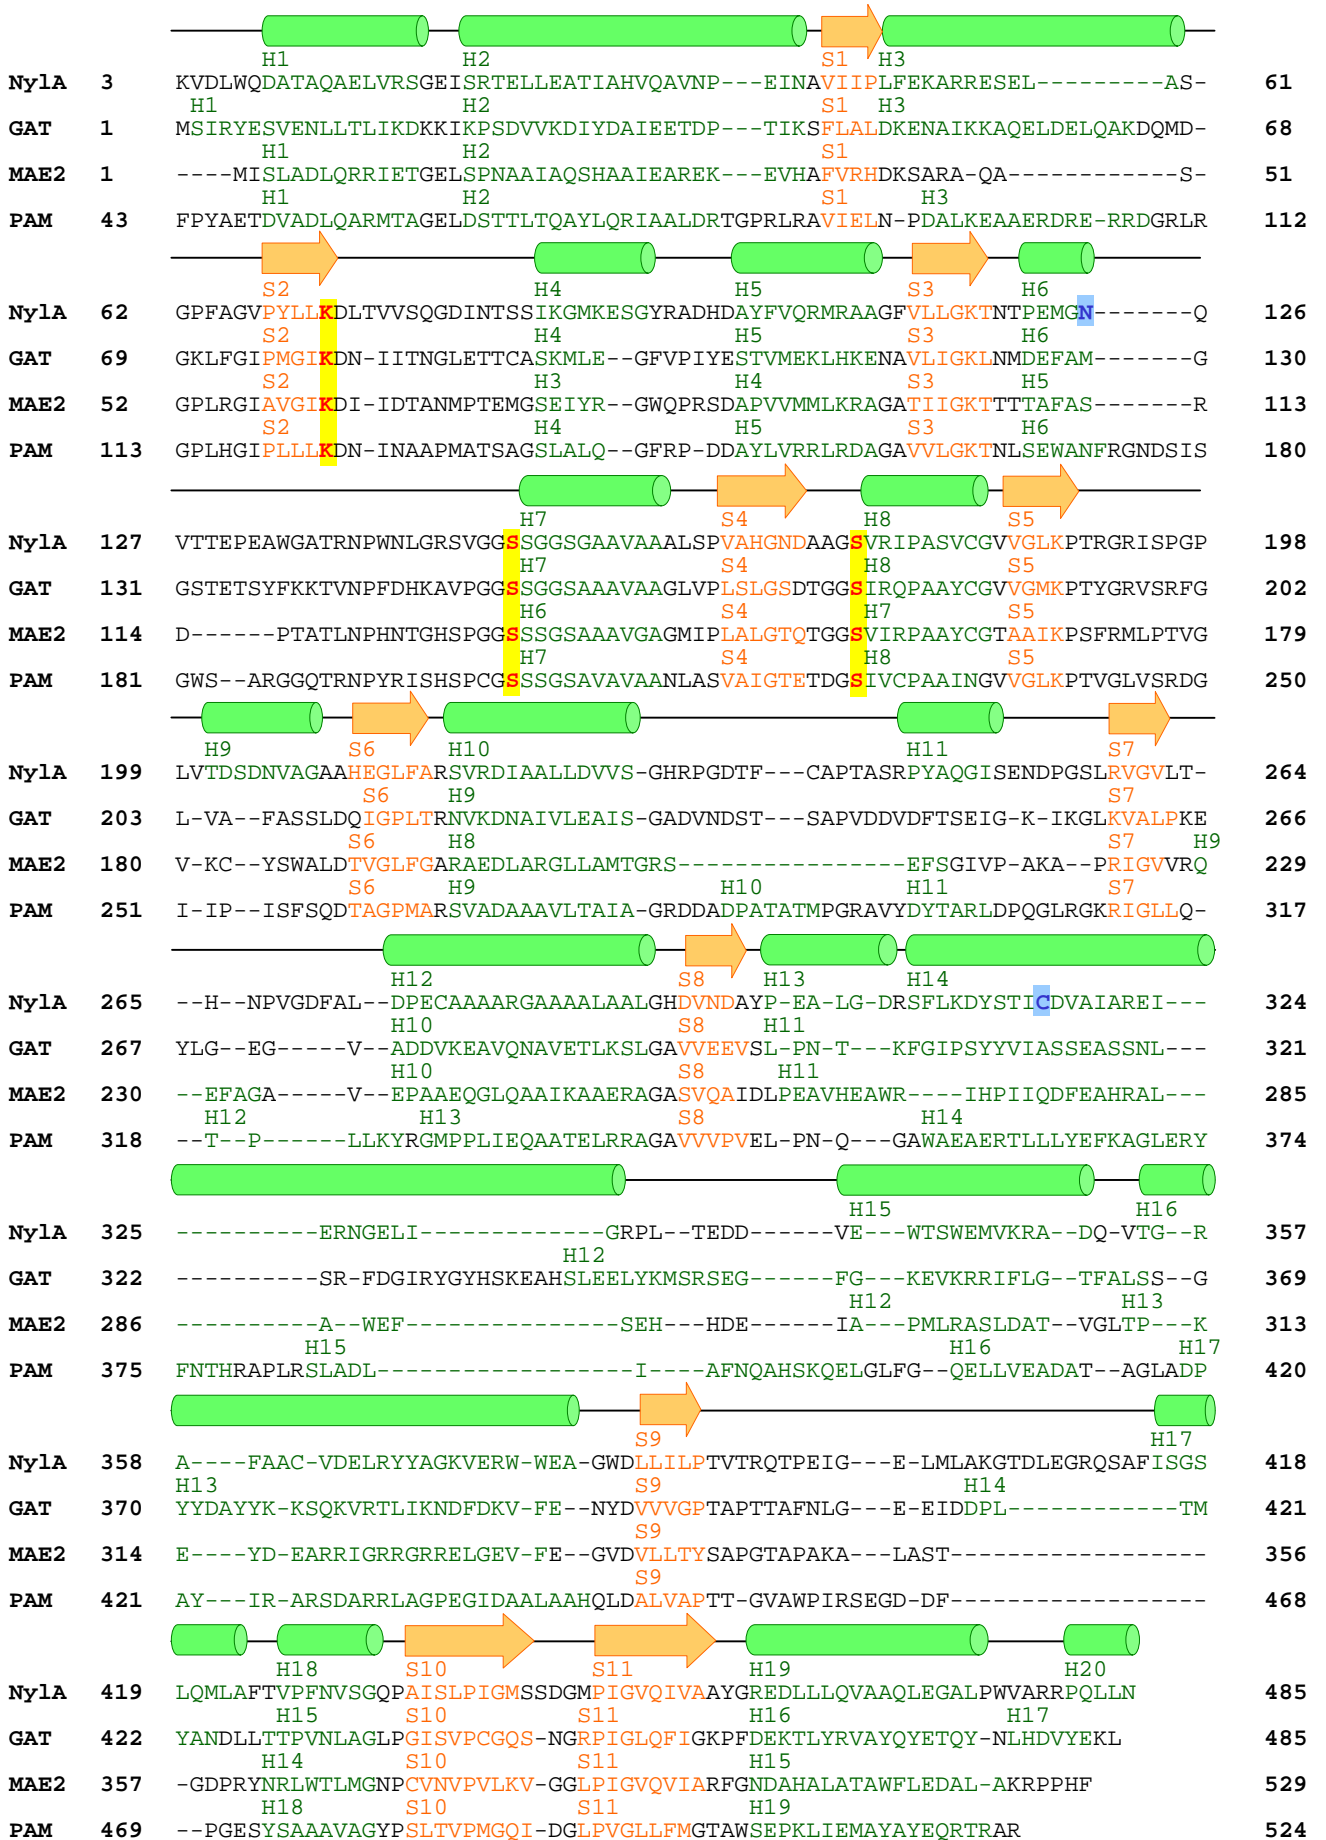

Fig. S1

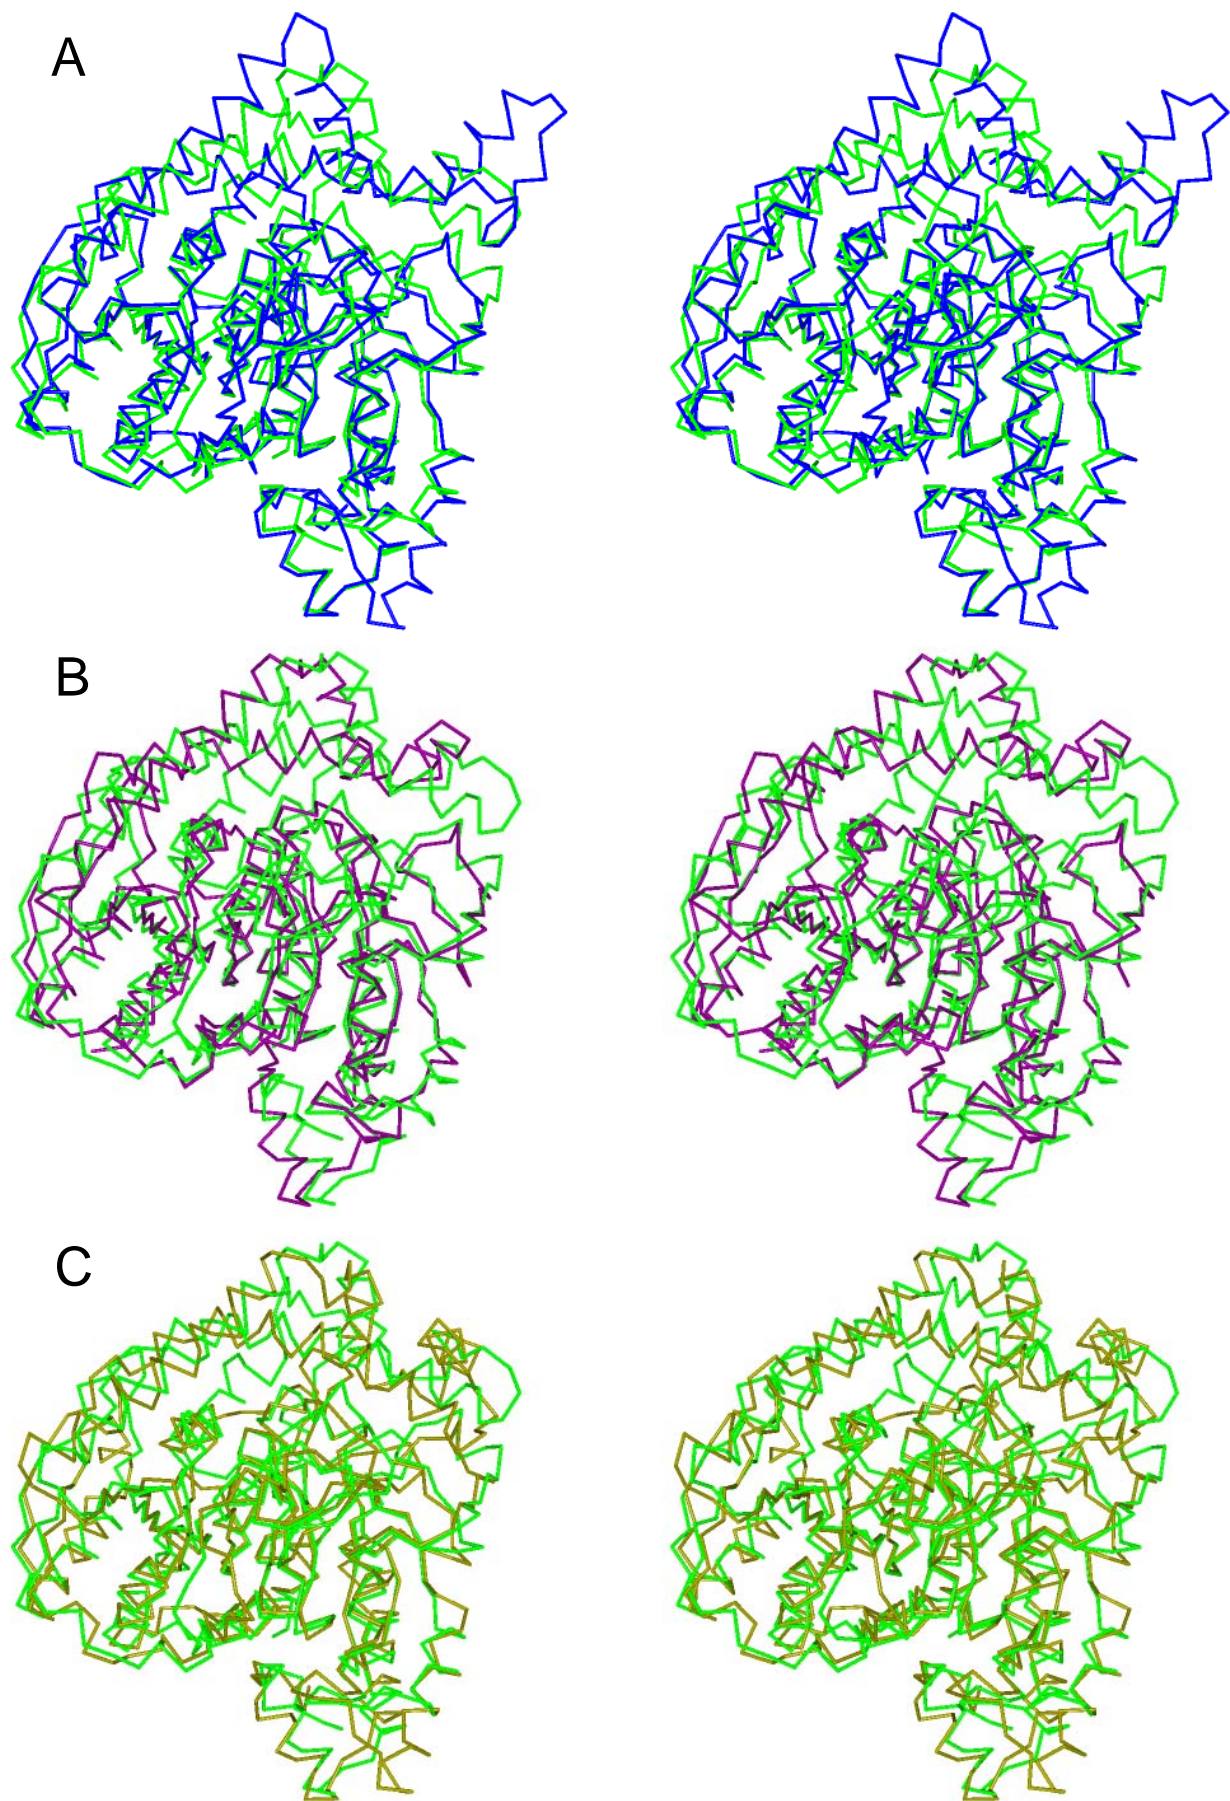

Fig. S2

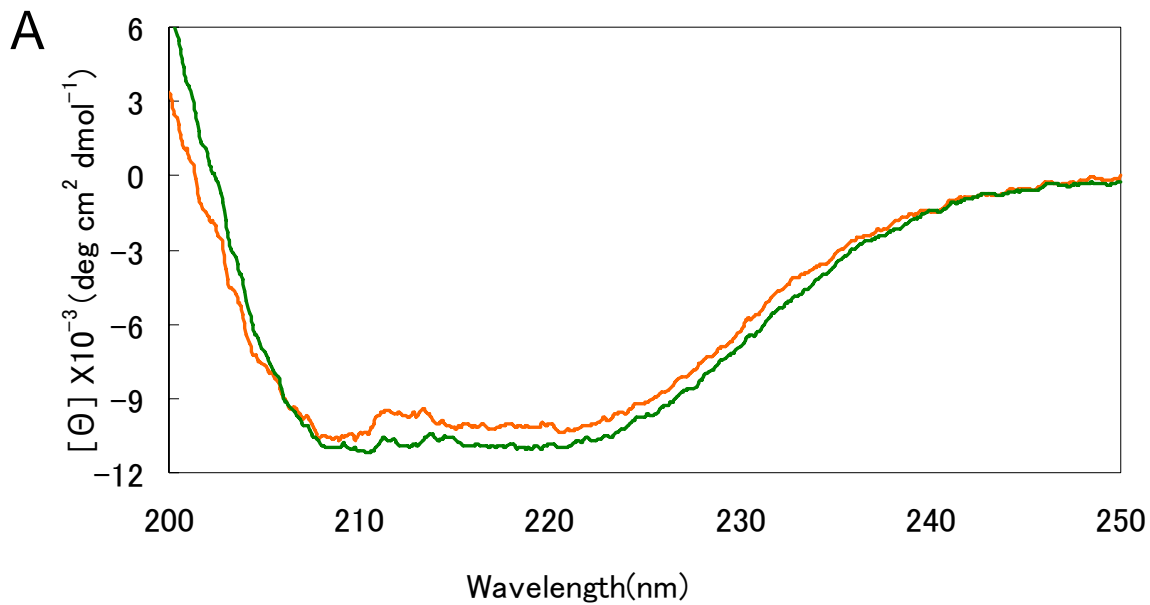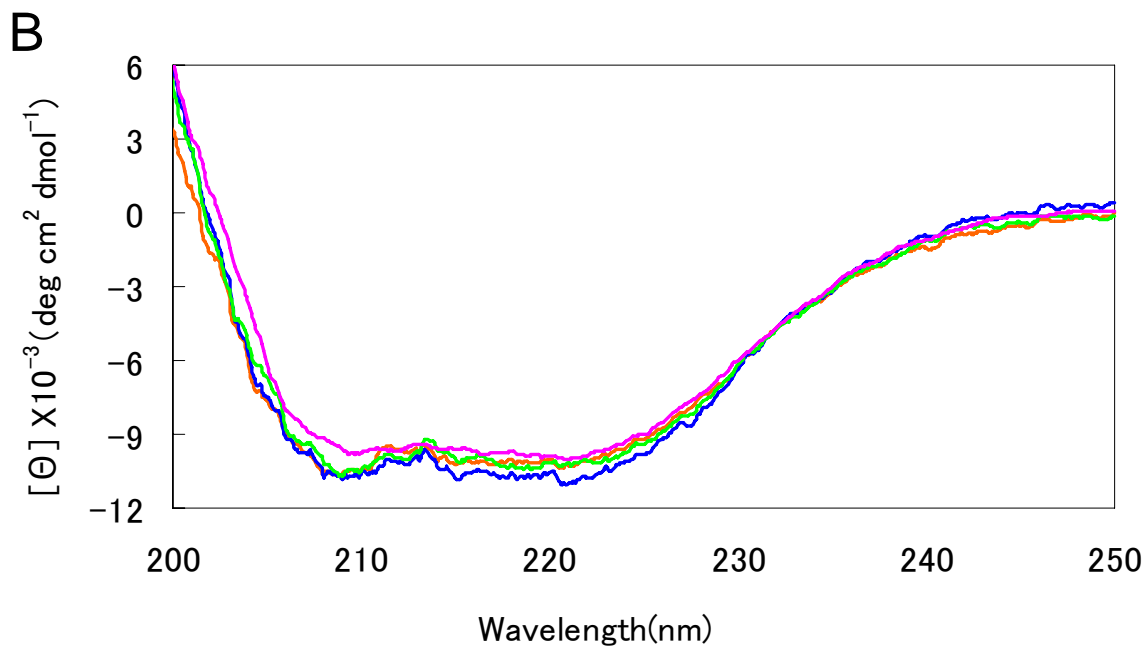

Fig. S3

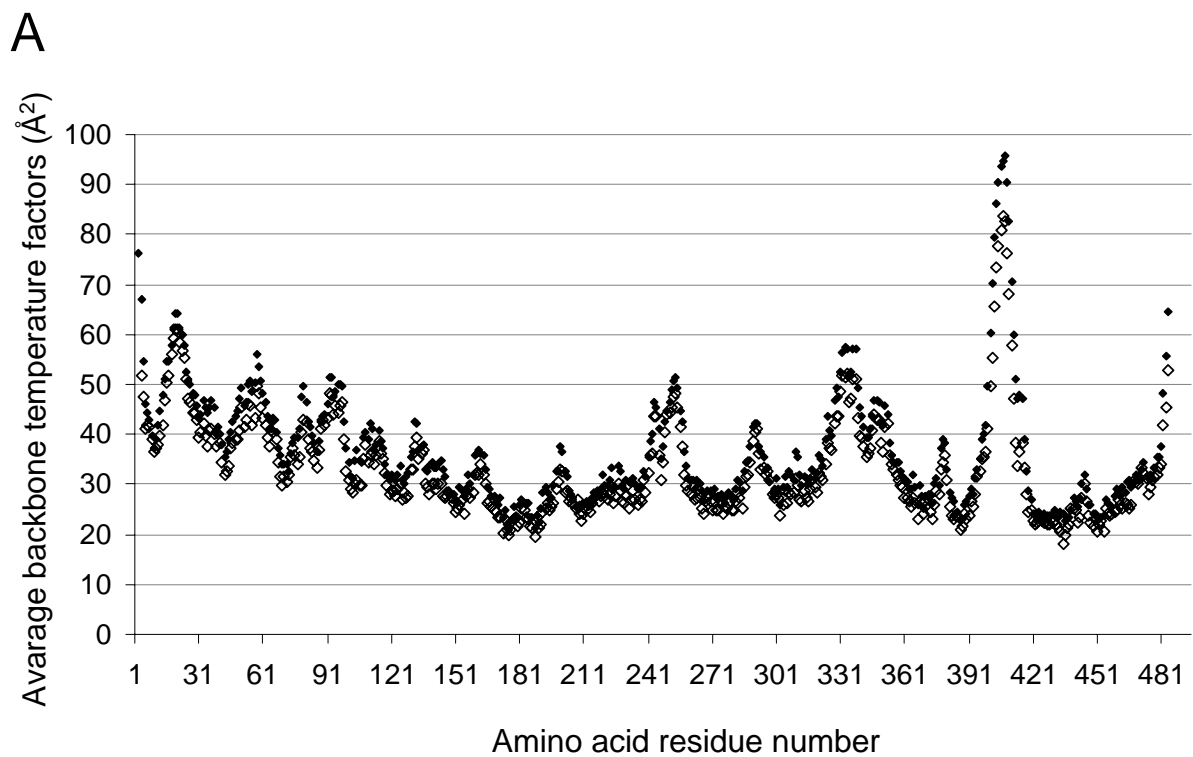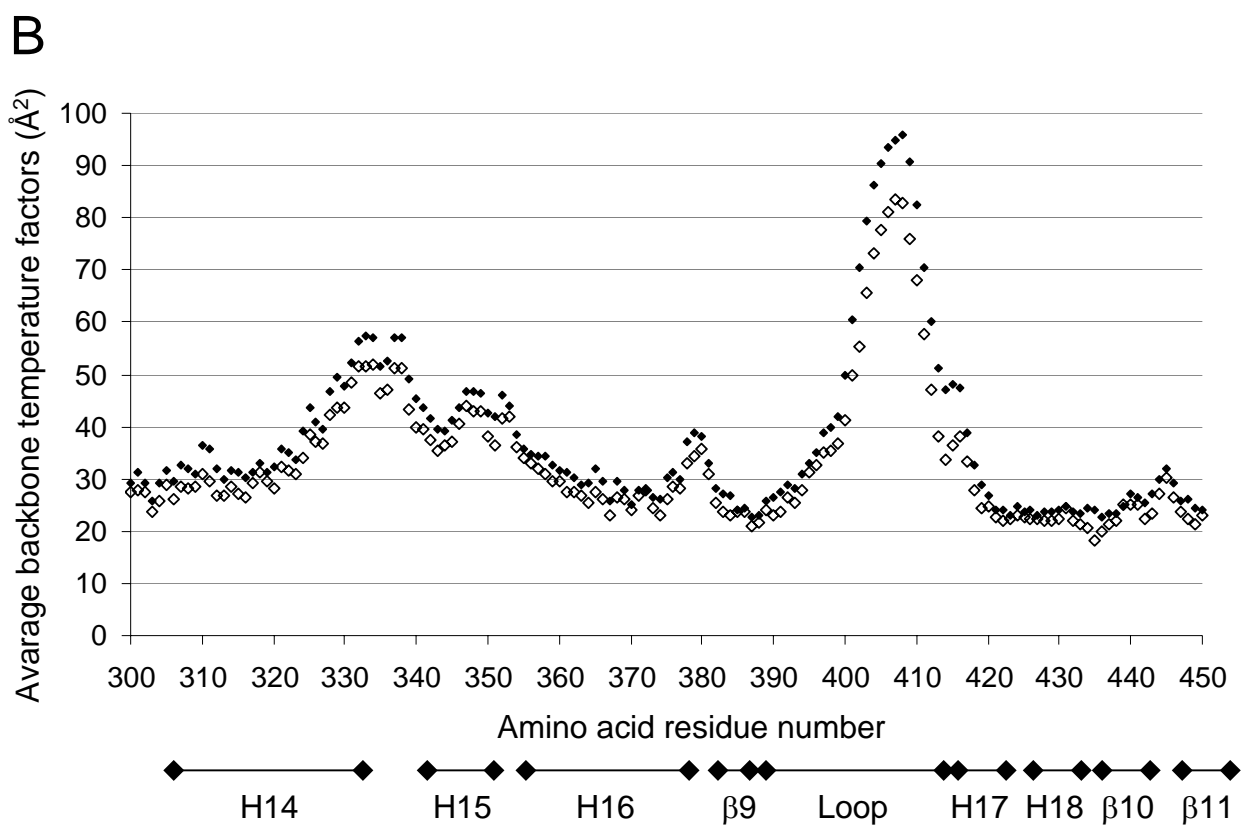

Fig. S4
